# Supplementary material for: Approaches to describing inter-rater reliability of the overall clinical appearance of febrile infants and toddlers in the emergency department
Source: PeerJ journal article supplement (doi:10.7717/peerj.651), 2014-11-11
Supplement: variable_description.pdf [file variable_description.pdf]

```

obs:      159
vars:     59          18 Jul 2014 00:17
size:    88,563      (_dta has notes)

```

| variable name    | storage type | display format | value label | variable label                                       |
|------------------|--------------|----------------|-------------|------------------------------------------------------|
| firststexamtime  | str5         | %9s            |             | 1st Exam Time                                        |
| secondndexamtime | str5         | %9s            |             | 2nd Exam Time                                        |
| audit            | str3         | %9s            |             | Audit                                                |
| auditorname      | str16        | %16s           |             | Auditor Name                                         |
| date             | str10        | %10s           |             | Date                                                 |
| date1            | str10        | %10s           |             | Date 1                                               |
| date2            | str10        | %10s           |             | Date 2                                               |
| dateofbirth      | str10        | %10s           |             | Date of Birth                                        |
| diagnosis        | str106       | %106s          |             | Raw diagnosis                                        |
| disposition      | str9         | %9s            |             | Disposition                                          |
| disptime         | str10        | %10s           |             |                                                      |
| examiner1        | str14        | %14s           |             | Examiner 1                                           |
| examiner2        | str15        | %15s           |             | Examiner 2                                           |
| initialimpres-1  | str21        | %21s           |             | First MD Gestalt Impression                          |
| initialimpres-2  | str21        | %21s           |             | First MD Impression after exam                       |
| initialimpres-3  | str21        | %21s           |             | Second MD Gestalt Impression                         |
| initialimpres-4  | str21        | %21s           |             | Second MD Impression after exam                      |
| providertype     | str17        | %17s           |             | Provider Type                                        |
| providertype2    | str17        | %17s           |             | Provider Type 2                                      |
| raname           | str19        | %19s           |             | RA Name                                              |
| sex              | str6         | %9s            |             | Sex                                                  |
| studyid          | str5         | %9s            |             | Study ID                                             |
| tylenolbefore-m  | str3         | %9s            |             | Any antipyretic before first exam                    |
| tylenolinterm-e  | str3         | %9s            |             | Any antipyretic after first and before second exam   |
| id2              | float        | %9.0g          |             |                                                      |
| time1            | str20        | %20s           |             | Date/Time first exam -MASKED                         |
| time2            | str20        | %20s           |             | Date/Time first exam -MASKED                         |
| t1               | double       | %10.0g         |             | Masked for privacy time/date first exam              |
| t2               | double       | %10.0g         |             | Masked for privacy time/date second exam             |
| interval         | float        | %9.0g          |             | Minutes between two exams                            |
| dob              | float        | %9.0g          |             | Masked =99 for privacy                               |
| admit            | float        | %9.0g          |             | Admitted =1                                          |
| dos              | float        | %9.0g          |             | Date of Service                                      |
| agedays          | float        | %9.0g          |             | Age in days                                          |
| age              | float        | %9.0g          |             | Age in months                                        |
| pair_type1       | float        | %9.0g          |             | Both observers were Attending R4 or PA-C             |
| pair_type2       | float        | %9.0g          |             | Difference >2 yrs in experience between raters       |
| antipyretic_h-e  | float        | %9.0g          | yesno       | Antipyretic before presentation                      |
| antipyretic_b-n  | float        | %9.0g          | yesno       | Antipyretic between exams                            |
| impression1      | float        | %14.0g         | appear      | First MD Gestalt Impression                          |
| impression2      | float        | %14.0g         | appear      | First MD Impression after exam                       |
| impression3      | float        | %14.0g         | appear      | Second MD Gestalt Impression                         |
| impression4      | float        | %14.0g         | appear      | Second MD Impression after exam                      |
| dif_inter_ges-t  | float        | %32.0g         | agree       | Difference in Gestalt assessment                     |
| dif_inter_after  | float        | %32.0g         | agree       | Difference in assessment after full exam             |
| dif_intra1       | float        | %9.0g          |             | Difference in first Intra raters' evaluations        |
| dif_intra2       | float        | %9.0g          |             | Difference in first Intra raters' evaluations        |
| s_gestalt        | float        | %9.0g          |             | 1 if agreed Gestalt otherwise 0                      |
| s_after          | float        | %9.0g          |             | 1 if agreed after examining otherwise 0              |
| dx               | float        | %23.0g         | dx          | Grouped clinical diagnosis at disposition            |
| dx_simple        | float        | %23.0g         | dxs         | Simplified grouped clinical diagnosis at disposition |
| prvd1            | float        | %14.0g         | prvd        | Coded provider level first examiner                  |
| prvd2            | float        | %14.0g         | prvd        | Coded provider level second examiner                 |
| interval10       | float        | %9.0g          |             | Number of 10 minute intervals between evaluations    |
| pr1              | float        | %9.0g          | pr_summary  | Provider 1 , 1 =pgyl/2 2=pgy3/4 3 =MLP 4=attending   |
| pr2              | float        | %9.0g          | pr_summary  | Provider 2 , 1 =pgyl/2 2=pgy3/4 3 =MLP 4=attending   |
| dif_pr           | float        | %9.0g          |             | Diference in providers -pr coding scheme             |
| dif_prvd         | float        | %9.0g          |             | Diference in providers -prvd coding scheme           |
| id_masked        | float        | %9.0g          |             |                                                      |
